# Supplementary material for: Preventing corneal blindness caused by keratitis using artificial intelligence
Source: PubMed Central journal article supplement (PMC8213803; doi:10.1038/s41467-021-24116-6), 2021-06-18
Supplement: 41467_2021_24116_MOESM1_ESM.pdf [file 41467_2021_24116_MOESM1_ESM.pdf]

# **Title: Preventing corneal blindness caused by keratitis using artificial intelligence**

## **Supplementary Information**

- 1. Supplementary Figure 1. Visualization by t-distributed stochastic neighbor embedding (t-SNE) of the separability for the features learned by deep learning algorithms in the external test datasets. a** Zhejiang Eye Hospital (ZEH) dataset. **b** Jiangdong Eye Hospital (JEH) dataset. **c** Ningbo Ophthalmic Center (NOC) dataset. **d** “Smartphone” indicates the smartphone dataset. “Normal” indicates normal cornea. “Others” indicates cornea with other abnormalities.
- 2. Supplementary Figure 2. Confusion matrices of three deep learning algorithms in external test datasets. a** Zhejiang Eye Hospital (ZEH) dataset. **b** Jiangdong Eye Hospital (JEH) dataset. **c** Ningbo Ophthalmic Center (NOC) dataset. **d** “Smartphone” indicates the smartphone dataset. “Normal” indicates normal cornea. “Others” indicates cornea with other abnormalities.
- 3. Supplementary Figure 3. Classification errors by the deep learning system in both internal and external test datasets. a** Misclassification of “keratitis” by the deep learning system. **b** Misclassification of “cornea with other abnormalities” by the deep learning system. **c** Misclassification of “normal cornea” by the deep learning system.
- 4. Supplementary Figure 4. Performance of the best deep learning algorithm DenseNet121 in the external datasets with and without poor-quality images. a** Zhejiang Eye Hospital (ZEH) dataset. **b** Jiangdong Eye Hospital (JEH) dataset. **c** Ningbo Ophthalmic Center (NOC) dataset. **d** “Smartphone” indicates the smartphone dataset. “Normal” indicates normal cornea. “Others” indicates cornea with other abnormalities. DEPI, datasets excluding poor-quality images. DIPI, datasets including poor-quality images.
- 5. Supplementary Figure 5. Relationship between the misclassification rates and predicted probability values.** “Normal” indicates normal cornea. “Others” indicates cornea with other abnormalities. The misclassification rate is the fraction of misclassified images in each predicted probability interval between the breaking points.
- 6. Supplementary Table 1. Performance of the best deep learning system vs. corneal specialists in the ZEH dataset.**

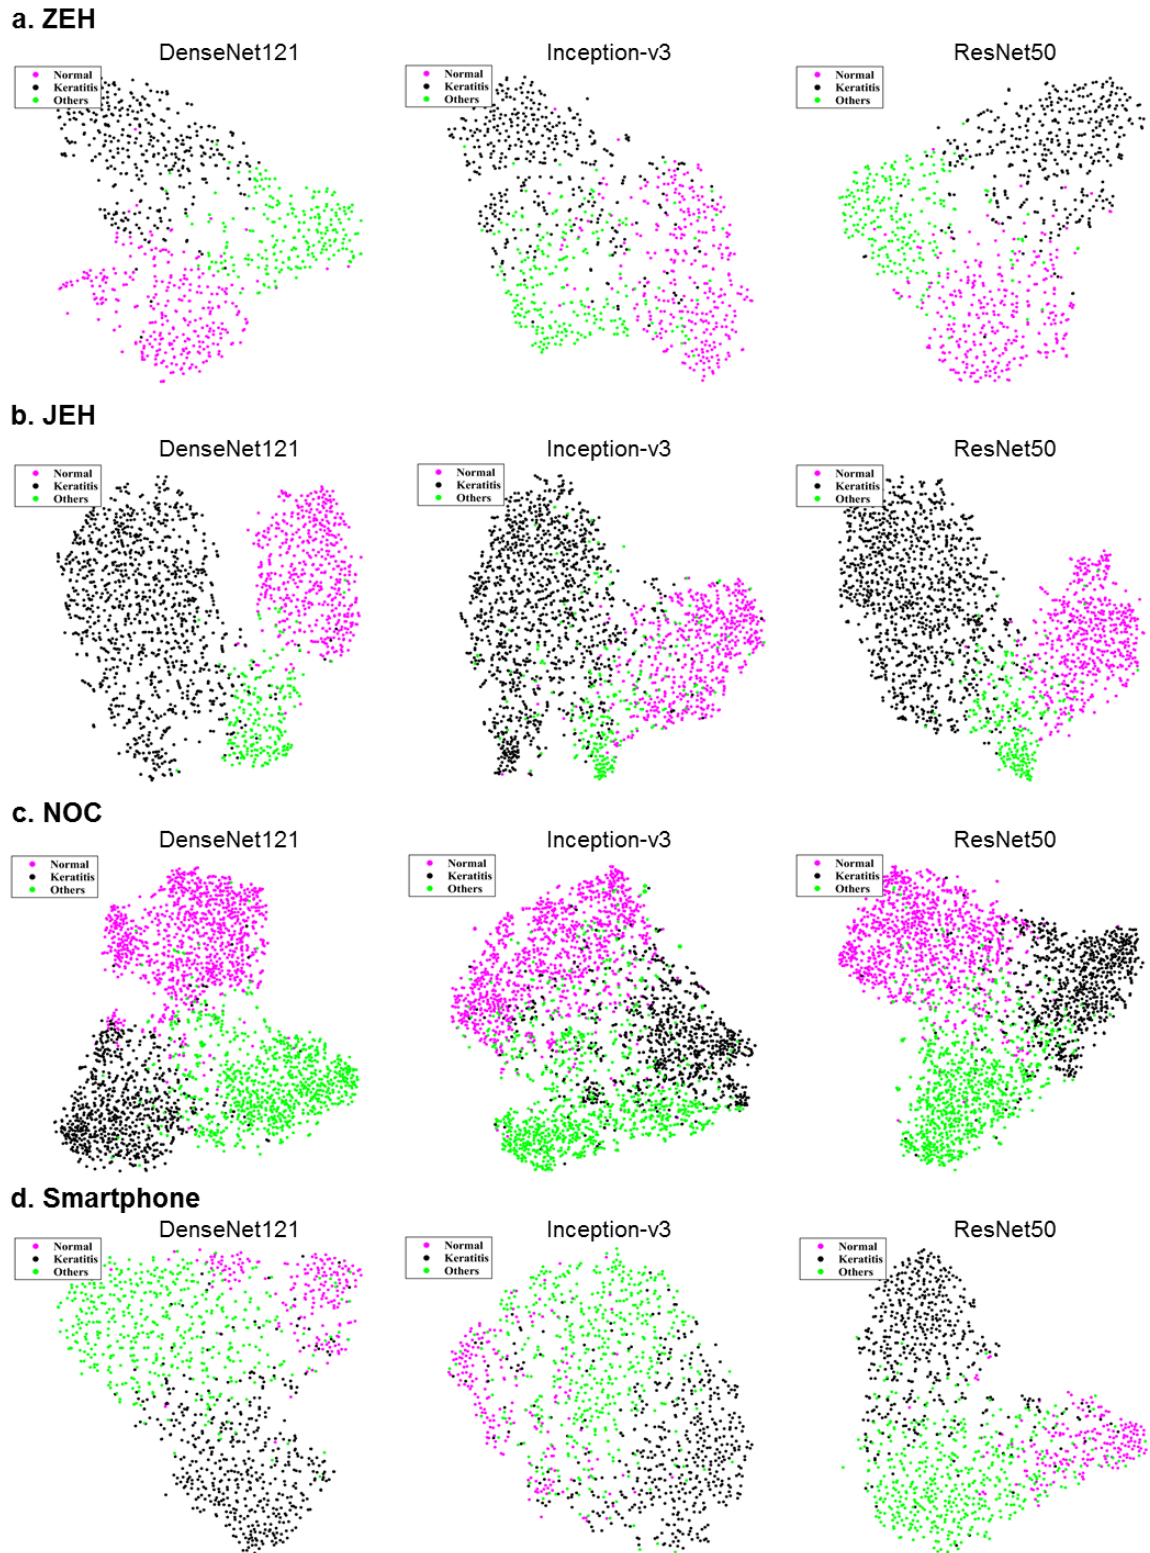

**7. Supplementary Figure 1. Visualization by t-distributed stochastic neighbor embedding (t-SNE) of the separability for the features learned by deep learning algorithms in the external test datasets. a** Zhejiang Eye Hospital (ZEH) dataset. **b** Jiangdong Eye Hospital (JEH) dataset. **c** Ningbo Ophthalmic Center (NOC) dataset. **d** “Smartphone” indicates the smartphone dataset. “Normal” indicates normal cornea. “Others” indicates cornea with other abnormalities.

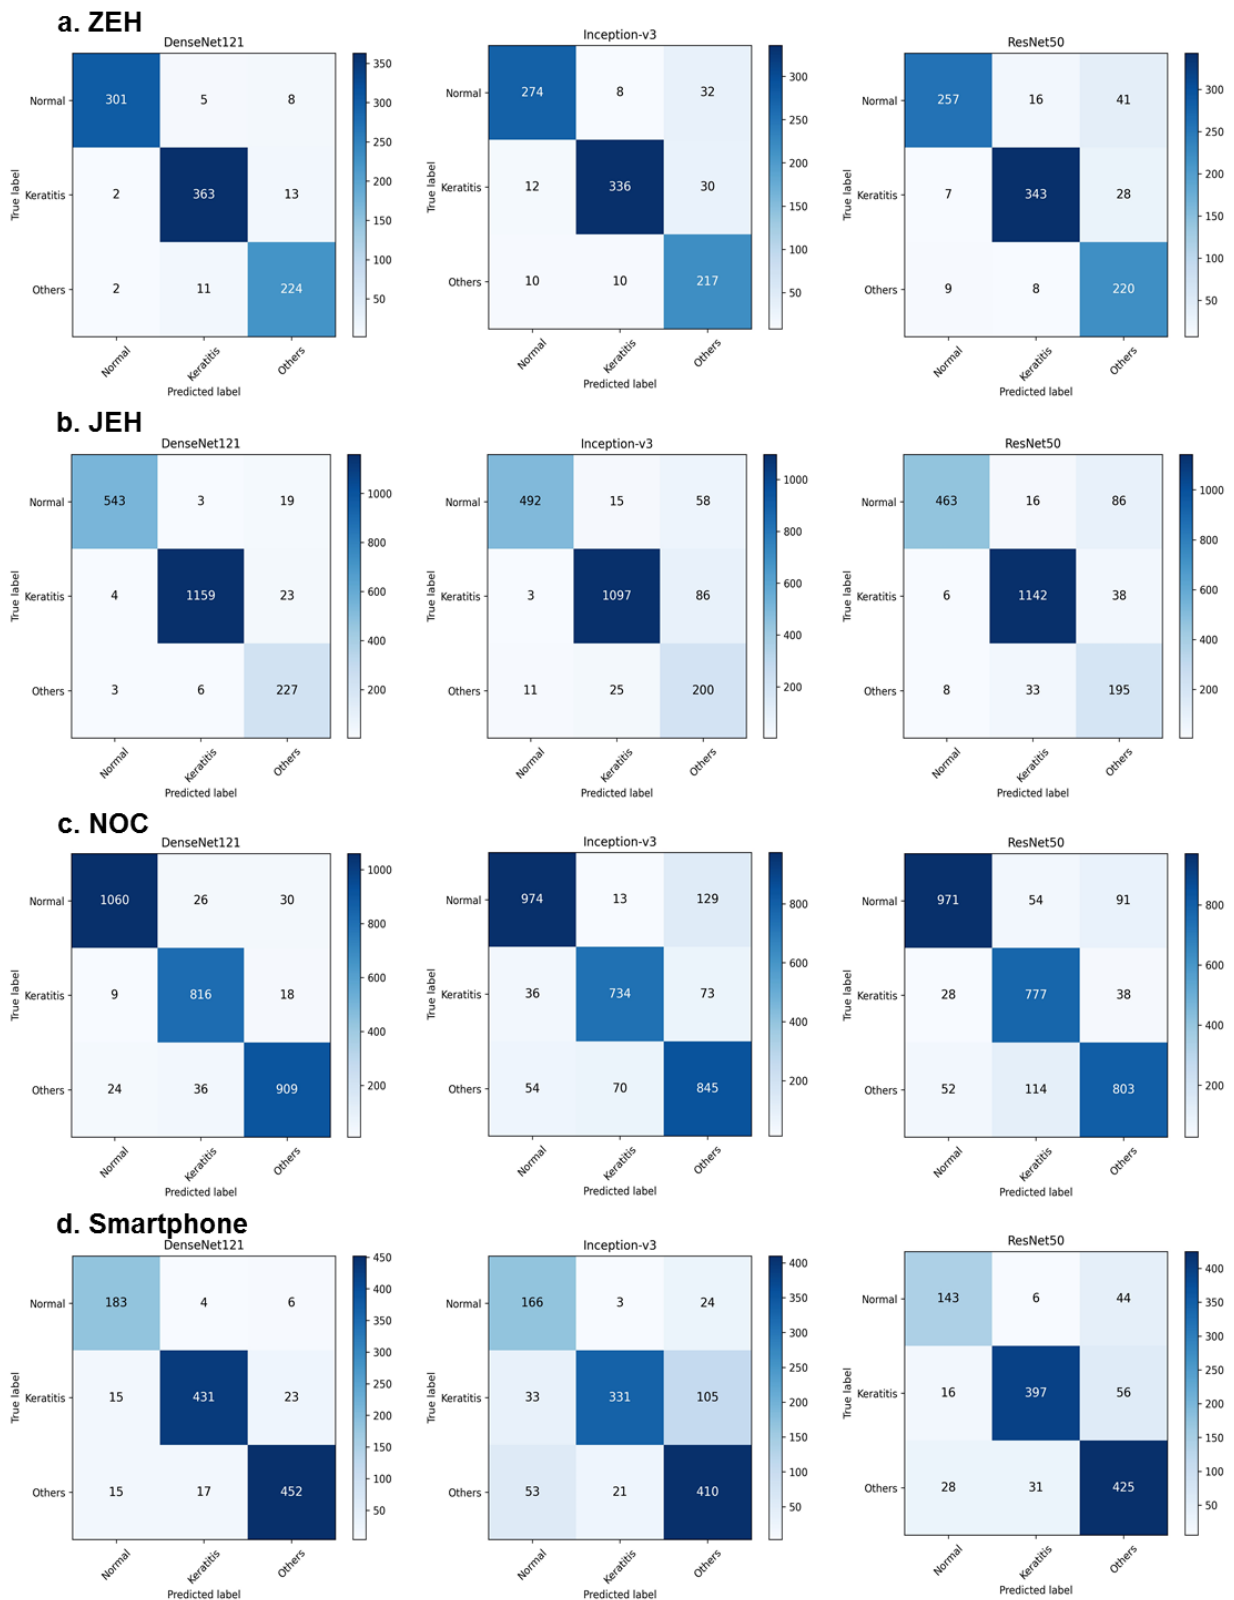

**8. Supplementary Figure 2. Confusion matrices of three deep learning algorithms in external test datasets. a** Zhejiang Eye Hospital (ZEH) dataset. **b** Jiangdong Eye Hospital (JEH) dataset. **c** Ningbo Ophthalmic Center (NOC) dataset. **d** “Smartphone” indicates the smartphone dataset. “Normal” indicates normal cornea. “Others” indicates cornea with other abnormalities.

**a Misclassification of “keratitis” by the deep learning system**

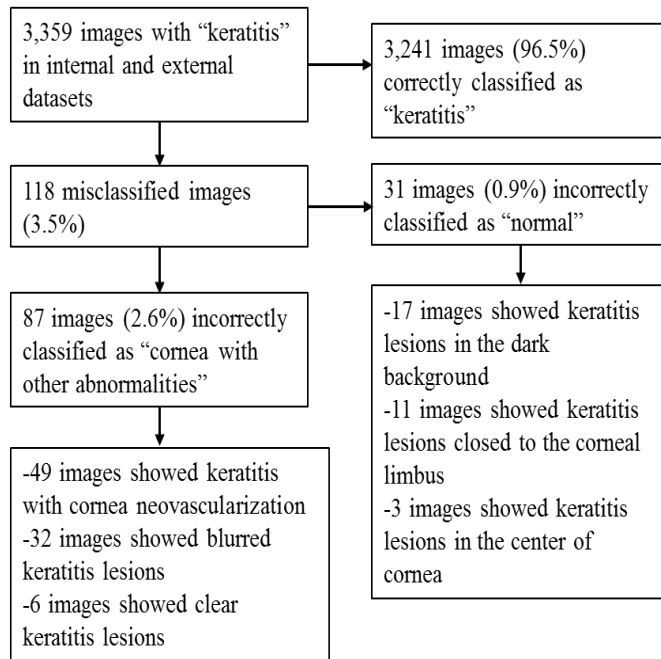

**b Misclassification of “cornea with other abnormalities” by the deep learning system**

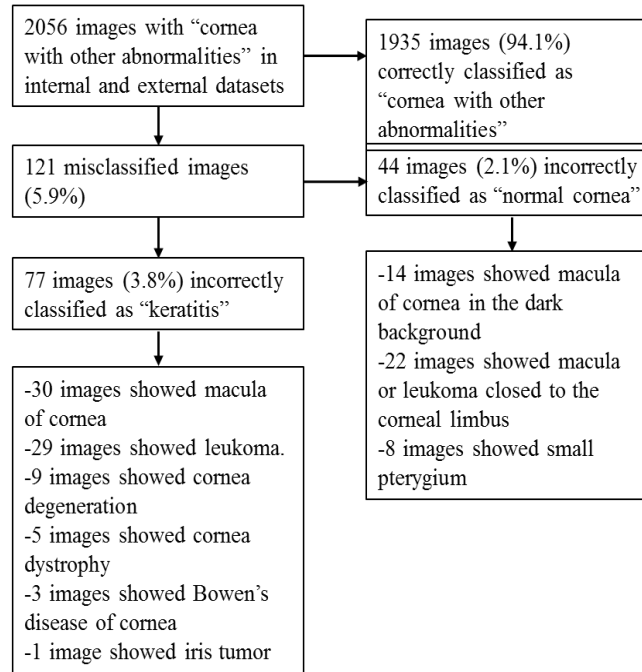

**c Misclassification of “normal cornea” by the deep learning system**

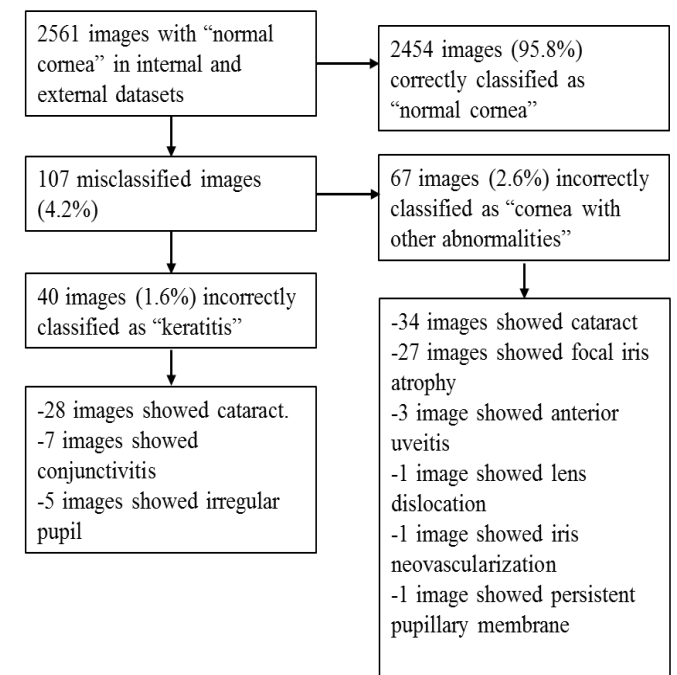

**Supplementary Figure 3. Classification errors by the deep learning system in both internal and external test datasets. a** Misclassification of “keratitis” by the deep learning system. **b** Misclassification of “cornea with other abnormalities” by the deep learning system. **c** Misclassification of “normal cornea” by the deep learning system.

### a. ZEH

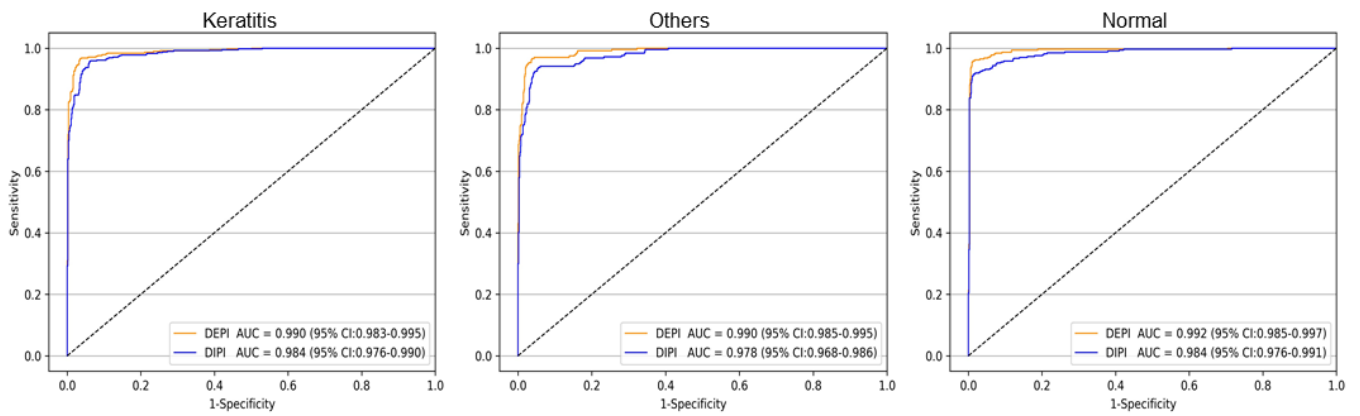

### b. JEH

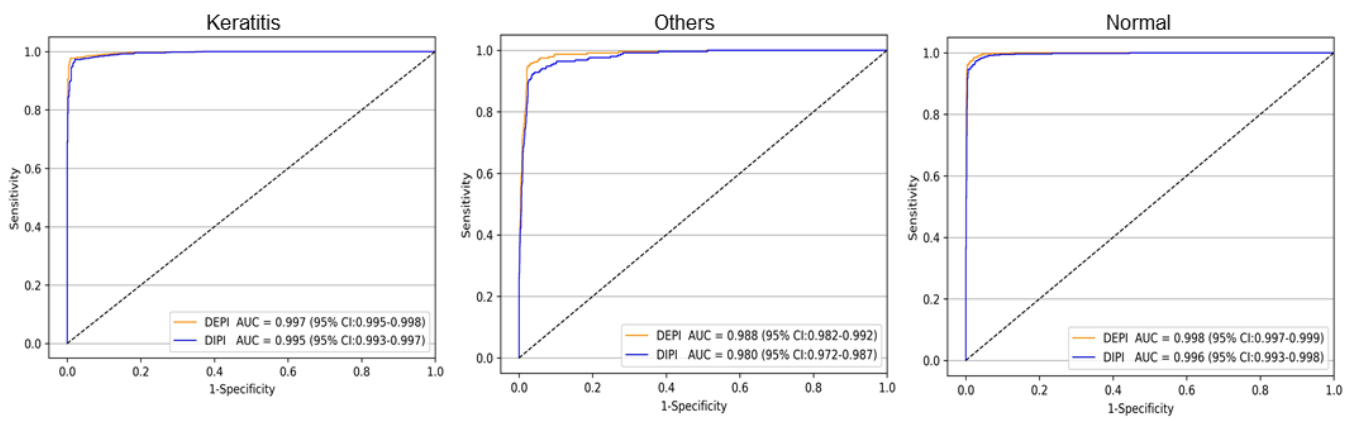

### c. NOC

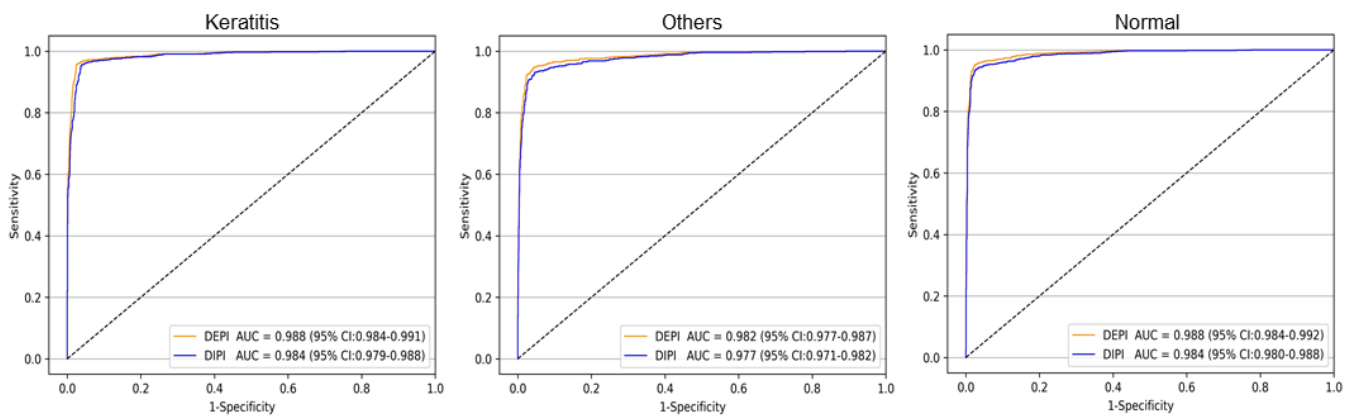

### d. Smartphone

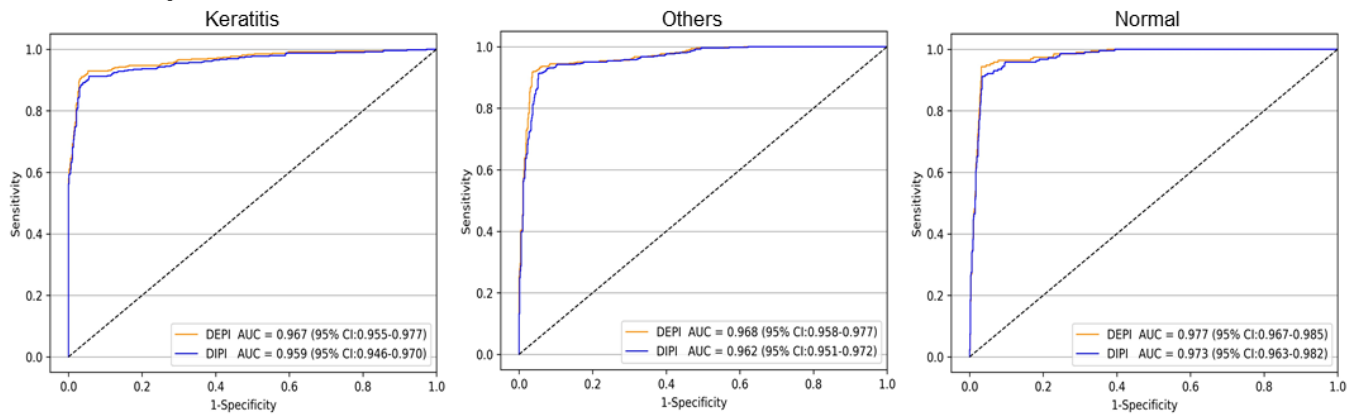

**Supplementary Figure 4. Performance of the best deep learning algorithm DenseNet121 in the external datasets with and without poor-quality images. a** Zhejiang Eye Hospital (ZEH) dataset. **b** Jiangdong Eye Hospital (JEH) dataset. **c** Ningbo Ophthalmic Center (NOC) dataset. **d** “Smartphone” indicates the smartphone dataset. “Normal” indicates normal cornea. “Others” indicates cornea with other abnormalities. DEPI, datasets excluding poor-quality images. DIPI, datasets including poor-quality images.

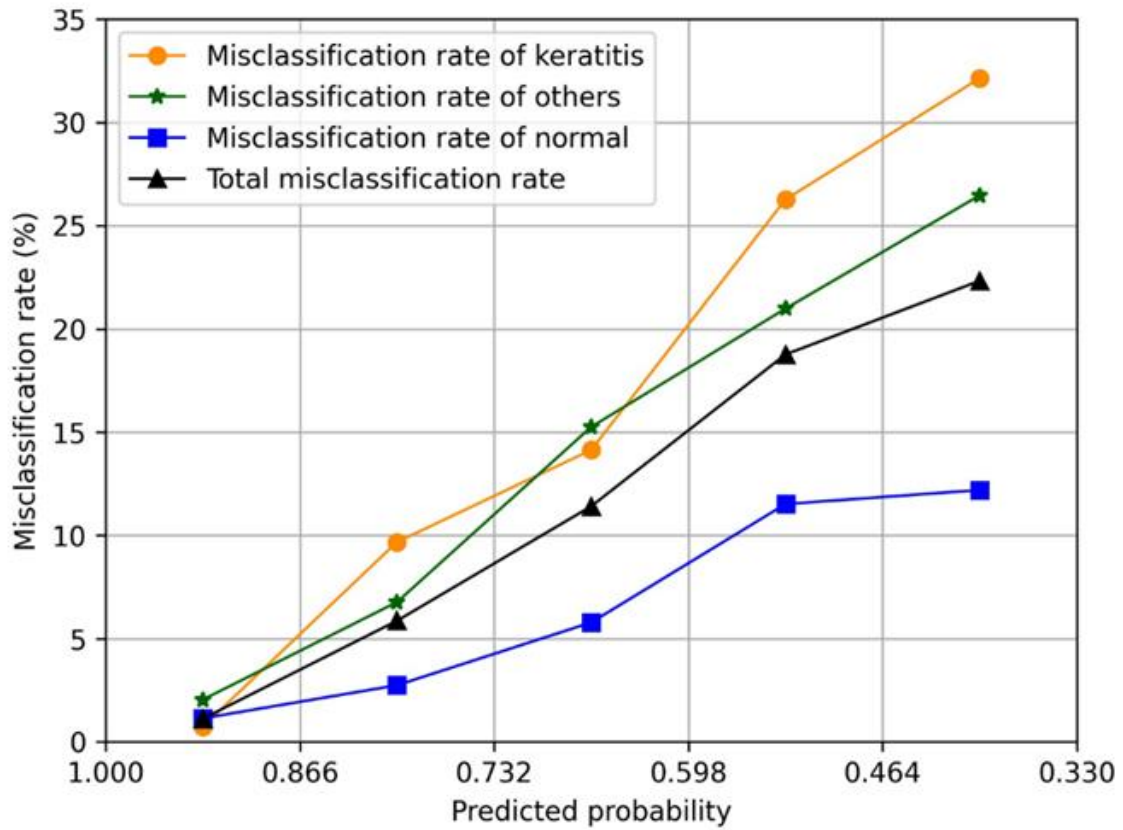

**Supplementary Figure 5. Relationship between the misclassification rates and predicted probability values.** Normal” indicates normal cornea. “Others” indicates cornea with other abnormalities. The misclassification rate is the fraction of misclassified images in each predicted probability interval between the breaking points.

**Supplementary Table 1. Performance of the best deep learning system vs. corneal specialists in the ZEH dataset.**

|                                      | Deep learning system | Corneal specialist A | Corneal specialist B | P1    | P2    |
|--------------------------------------|----------------------|----------------------|----------------------|-------|-------|
| <b>Keratitis vs. others + normal</b> |                      |                      |                      |       |       |
| Sensitivity (95% CI)                 | 96.0% (94.1-98.0)    | 95.0% (92.8-97.2)    | 97.1% (95.4-98.8)    | .600  | .549  |
| Specificity (95% CI)                 | 97.1% (95.7-98.5)    | 97.1% (95.7-98.5)    | 97.5% (96.1-98.8)    | 1.000 | .853  |
| Accuracy (95% CI)                    | 96.7% (95.5-97.8)    | 96.2% (95.0-97.5)    | 97.3% (96.3-98.3)    | .707  | .497  |
| <b>Others vs. keratitis + normal</b> |                      |                      |                      |       |       |
| Sensitivity (95% CI)                 | 94.5% (91.6-97.4)    | 92.4% (89.0-95.8)    | 93.7% (90.6-96.8)    | .457  | .846  |
| Specificity (95% CI)                 | 97.0% (95.7-98.2)    | 96.1% (94.7-97.5)    | 97.5% (96.4-98.7)    | .463  | .622  |
| Accuracy (95% CI)                    | 96.3% (95.1-97.5)    | 95.2% (93.8-96.5)    | 96.6% (95.4-97.7)    | .250  | .900  |
| <b>Normal vs. keratitis + others</b> |                      |                      |                      |       |       |
| Sensitivity (95% CI)                 | 95.9% (93.7-98.1)    | 96.5% (94.5-98.5)    | 97.1% (95.3-99.0)    | .835  | .515  |
| Specificity (95% CI)                 | 99.3% (98.7-100)     | 99.2% (98.5-99.9)    | 99.3% (98.7-100)     | 1.000 | 1.000 |
| Accuracy (95% CI)                    | 98.2% (97.3-99.0)    | 98.3% (97.4-99.1)    | 98.6% (97.8-99.4)    | 1.000 | .581  |

P1 refers to the  $p$ -value that was calculated between the deep learning system and corneal specialist A using the two-sided McNemar test. P2 refers to the  $p$ -value that was calculated between the deep learning system and corneal specialist B using the two-sided McNemar test. ZEH, Zhejiang Eye Hospital. Cornea specialist A has 3 years of clinical experience. Cornea specialist B has 6 years of clinical experience.
